# Supplementary material for: Kinetics of the oxidation of isoniazid with the hypochlorite ion
Source: Royal Society of Chemistry journal article supplement (doi:10.1039/c5ra13540k), 2015-01-01
Supplement: c5ra13540k1.pdf [file c5ra13540k1.pdf]

Supplementary Information

for

**Kinetics of the Oxidation of Isoniazid with Hypochlorite Ion**

Virág Bogdándi, Gábor Lente\* and István Fábián

Department of Inorganic and Analytical Chemistry, University of Debrecen, Debrecen,  
Hungary

## Derivation of the absorbance for spectrophotometric titration:

Suppose that a general reaction with the following stoichiometry is investigated by spectrophotometric titration:

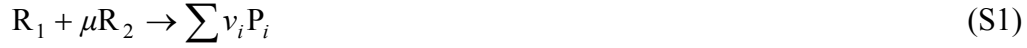

The stoichiometric coefficient of  $R_1$  is set 1, this can always be achieved by normalizing the equation (as a consequence, the rest of the coefficients,  $\mu$  and  $v_i$  are not necessarily integers). A titration is carried out by selecting a suitable volume of the solution ( $V_{ini}$ ) of reagent  $R_1$  with concentration  $c_{R1}$  and adding the titrant solution of  $R_2$  with concentration  $c_{R2}$  gradually. The initial amount of substance for reagent A is  $V_{ini}c_{R1}$  for the entire titration. After the addition of titrant solution with volume  $V$ , the amount of substance for reagent  $R_2$  is given as  $Vc_{R2}$ . There are two cases:

1. If a relatively low amount of titrant  $R_2$  has been added, reagent A remains in excess. The final concentration of  $R_2$  is  $[R_2] = 0$ , the concentration of remaining  $R_1$  is  $[R_1] = (V_{ini}c_{R1} - Vc_{R2}/\mu)/(V_{ini} + V)$ . The concentrations of the products are  $[P_i] = v_i/\mu \times Vc_{R2}/(V_{ini} + V)$ . According to Beer's law, each substance present can contribute to the absorbance. The molar absorptivity of  $R_1$  is  $\epsilon_{R1}$ , the molar absorptivity  $R_2$  is  $\epsilon_{R2}$ , the molar absorptivity of product  $P_i$  is  $\epsilon_{Pi}$ . Therefore, the absorbance reading after the addition of titrant solution with volume  $V$  is given as:

$$A = \epsilon_{R1}[R_1] + \epsilon_{R2}[R_2] + \sum \epsilon_{Pi}[P_i] = \epsilon_{R2} \frac{V_{ini}c_{R1} - Vc_{R2}/\mu}{V_{ini} + V} + \sum \frac{\epsilon_{Pi}v_i Vc_{R2}}{\mu(V_{ini} + V)} \quad (S2)$$

The dilution ( $\eta$ ) was defined in the main text as  $\eta = (V + V_{ini})/V_{ini}$ . The molar ratio of the two reactants ( $\xi$ ) is simply given as  $\xi = Vc_{R2}/(V_{ini}c_{R1})$ . With these new quantities, Eq. S2 can be successively re-arranged as follows:

$$\frac{V_{ini} + V}{V_{ini}} A = \epsilon_{R1}c_{R1} - \frac{\epsilon_{R1}Vc_{R2}}{\mu V_{ini}} + \sum \frac{\epsilon_{Pi}v_i Vc_{R2}}{\mu V_{ini}} \quad (S3)$$

$$\eta A = \epsilon_{R1}c_{R1} - \xi \frac{\epsilon_{R1}c_{R1}}{\mu} + \frac{\xi c_{R1}}{\mu} \sum \epsilon_{Pi}v_i \quad (S4)$$

$$\eta A = \epsilon_{R1}c_{R1} + \xi \left( \frac{c_{R1}}{\mu} \sum \epsilon_{Pi}v_i - \frac{\epsilon_{R1}c_{R1}}{\mu} \right) \quad (S5)$$

Therefore, if  $\eta A$  is plotted as a function of  $\xi$ , a straight line is expected with intercept  $\epsilon_{R1}c_{R1}$  and slope  $\left( \frac{c_{R1}}{\mu} \sum \epsilon_{Pi}v_i - \frac{\epsilon_{R1}c_{R1}}{\mu} \right)$ .

2. If reagent  $R_2$  has been added by excess, then  $R_1$  is not present any more  $[R_1] = 0$ . The concentration of remaining  $R_2$  is  $[R_2] = (Vc_{R2} - \mu V_{ini}c_{R1})/(V_{ini} + V)$ , whereas the concentrations of the products are  $[P_i] = v_i V_{ini}c_{R1}/(V_{ini} + V)$ . The absorbance signal then equals to:

$$A = \varepsilon_A[R_1] + \varepsilon_B[R_2] + \sum \varepsilon_{P_i}[P_i] = \varepsilon_{R_2} \frac{Vc_{R_2} - \mu V_{ini}c_{R_1}}{V_{ini} + V} + \sum \frac{\varepsilon_{P_i}v_i V_{ini}c_{R_1}}{(V_{ini} + V)} \quad (S6)$$

As in the previous case, this equation can be successively re-arranged as follows:

$$\frac{V_{ini} + V}{V_{ini}} A = \frac{\varepsilon_{R_2} V c_{R_2}}{V_{ini}} - \mu \varepsilon_{R_2} c_{R_1} + c_{R_1} \sum \varepsilon_{P_i} v_i \quad (S7)$$

$$\eta A = \varepsilon_{R_2} c_{R_1} \zeta + \left( c_{R_1} \sum \varepsilon_{P_i} v_i - \mu \varepsilon_{R_2} c_{R_1} \right) \quad (S8)$$

Again, if  $\eta A$  is plotted as a function of  $\zeta$ , a straight line is expected with intercept  $\left( c_{R_1} \sum \varepsilon_{P_i} v_i - \mu \varepsilon_{R_1} c_{R_2} \right)$  and slope  $\varepsilon_{R_2} c_{R_1}$ .

Therefore, it has been established that the points in the plot will lie on either of the two straight lines depending on whether they have been measured at an excess of  $R_1$  or  $R_2$ . The common point (intersection) of the straight lines is found at the value of  $\zeta_c$  where the  $\eta A$  values are equal.

$$\varepsilon_{R_1} c_{R_1} + \zeta_c \left( \frac{c_{R_1}}{\mu} \sum \varepsilon_{P_i} v_i - \frac{\varepsilon_{R_1} c_{R_1}}{\mu} \right) = \varepsilon_{R_2} c_{R_1} \zeta_c + \left( c_{R_1} \sum \varepsilon_{P_i} v_i - \mu \varepsilon_{R_2} c_{R_1} \right) \quad (S9)$$

This equation can be simplified by division with  $c_{R_1}$  and then re-arranged to give:

$$\zeta_c \left( \frac{1}{\mu} \sum \varepsilon_{P_i} v_i - \frac{\varepsilon_{R_1}}{\mu} - \varepsilon_{R_2} \right) = \sum \varepsilon_{P_i} v_i - \mu \varepsilon_{R_2} - \varepsilon_{R_1} \quad (S10)$$

Then a simple division gives the  $\zeta_c$  value where the intersection of the two straight lines occurs:

$$\zeta_c = \mu \quad (S11)$$

Therefore, the intersection of the two straight lines gives the stoichiometric coefficient of reagent  $R_2$ . A plot based on this method is given in Eq. 2 of the main article.

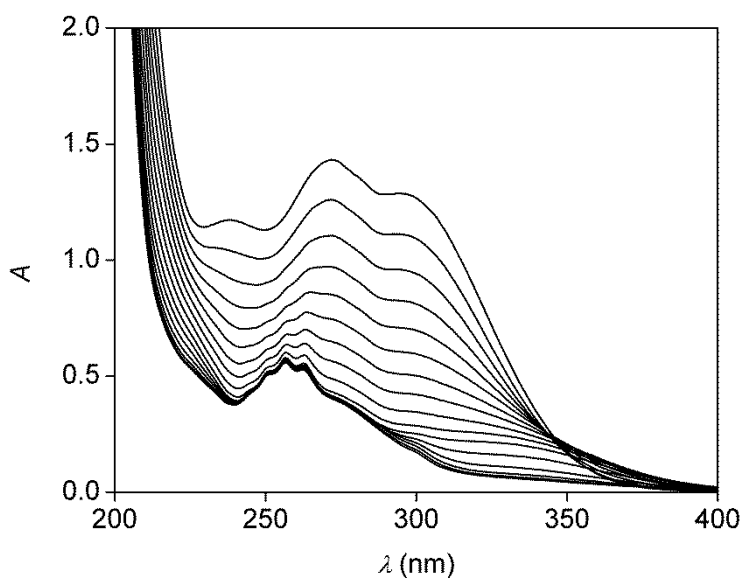

**Fig. S1** Stoichiometry determination in the oxidation of isoniazid with hypochlorite ion by spectrophotometric titration. Initial sample:  $[\text{INH}] = 0.30 \text{ mM}$ . Titrant concentration  $[\text{OCl}^-] = 1.0 \text{ mM}$ .  $[\text{OH}^-] = 10 \text{ mM}$ ,  $T = 25 \text{ }^\circ\text{C}$ ,  $l = 1.00 \text{ cm}$ . Titrant increment volume:  $100 \text{ }\mu\text{l}$ . The letter  $A$  represents absorbance.

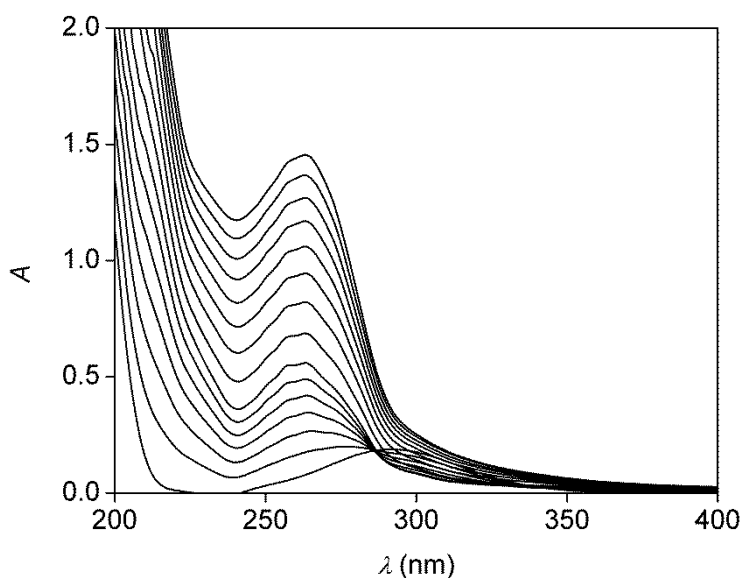

**Fig. S2** Stoichiometry determination in the oxidation of isoniazid with hypochlorite ion by spectrophotometric titration. Initial sample:  $[\text{OCl}^-] = 0.64 \text{ mM}$ . Titrant concentration:  $[\text{INH}] = 1.00 \text{ mM}$ .  $[\text{OH}^-] = 10 \text{ mM}$ ,  $T = 25 \text{ }^\circ\text{C}$ ,  $l = 1.00 \text{ cm}$ . Titrant increment volume:  $100 \text{ }\mu\text{l}$ . The letter  $A$  represents absorbance.

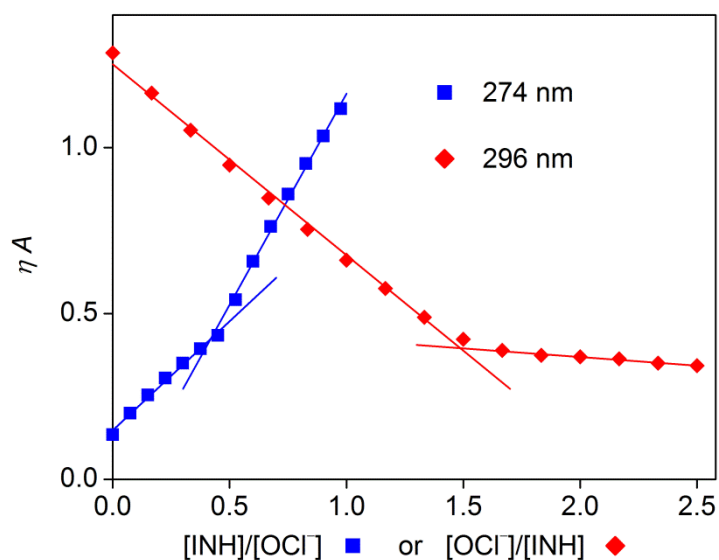

**Fig. S3** Stoichiometry determination in the oxidation of isoniazid with hypochlorite ion by spectrophotometric titration.  $[\text{OH}^-]_{\text{T}} = 10.0 \text{ mM}$ ,  $T = 25 \text{ }^\circ\text{C}$ ,  $l = 1.00 \text{ cm}$ . For red points: Initial sample:  $[\text{OCl}^-] = 0.64 \text{ mM}$ . Titrant concentration:  $[\text{INH}] = 1.00 \text{ mM}$ .  $[\text{OH}^-] = 10 \text{ mM}$ ,  $T = 25 \text{ }^\circ\text{C}$ ,  $l = 1.00 \text{ cm}$ . Titrant increment volume:  $100 \text{ }\mu\text{l}$ . For blue points: Initial sample:  $[\text{INH}] = 0.30 \text{ mM}$ . Titrant concentration  $[\text{OCl}^-] = 1.0 \text{ mM}$ .  $[\text{OH}^-] = 10 \text{ mM}$ ,  $T = 25 \text{ }^\circ\text{C}$ ,  $l = 1.00 \text{ cm}$ . Titrant increment volume:  $100 \text{ }\mu\text{l}$ .

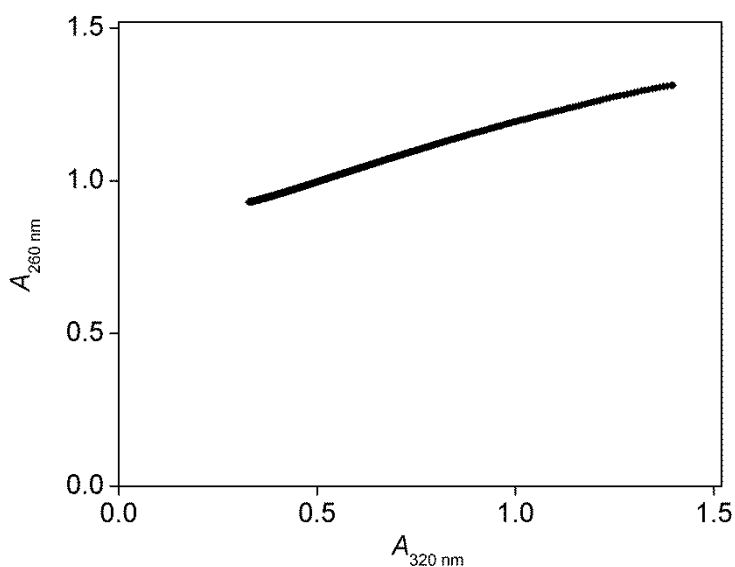

**Fig. S4** Absorbance correlation plot between data measured at 260 and 320 nm from the spectral stopped-flow experiments shown in Fig. 1 during the oxidation of isoniazid with hypochlorite ion.  $[\text{INH}] = 0.50 \text{ mM}$ ,  $[\text{OCl}^-] = 1.0 \text{ mM}$ ,  $[\text{OH}^-]_{\text{T}} = 10.0 \text{ mM}$ ,  $T = 25.0 \text{ }^\circ\text{C}$ ,  $l = 1.00 \text{ cm}$ ;  $t = 0.01, 0.05, 0.1, 0.15, 0.2, 0.3, 0.4, 0.5, 1.0, 2.0 \text{ s}$ . The letter  $A$  represents absorbance.

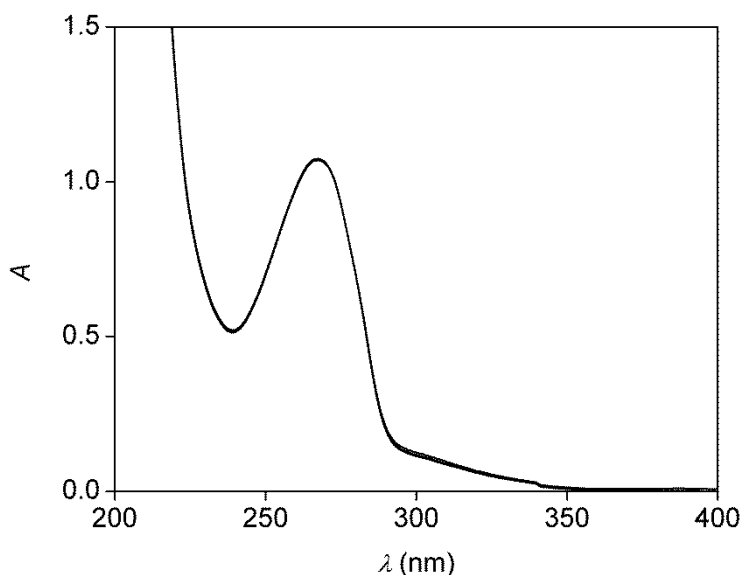

**Fig. S5** Spectral observations in the oxidation of isonicotinic acid with hypochlorite ion.  $[\text{INA}] = 0.50 \text{ mM}$ ,  $[\text{OCl}^-] = 0.50 \text{ mM}$ ,  $[\text{OH}^-]_{\text{T}} = 10.0 \text{ mM}$ ,  $T = 25 \text{ }^\circ\text{C}$ ,  $l = 1.00 \text{ cm}$ , total experiment time: 50 minutes. The letter  $A$  represents absorbance.

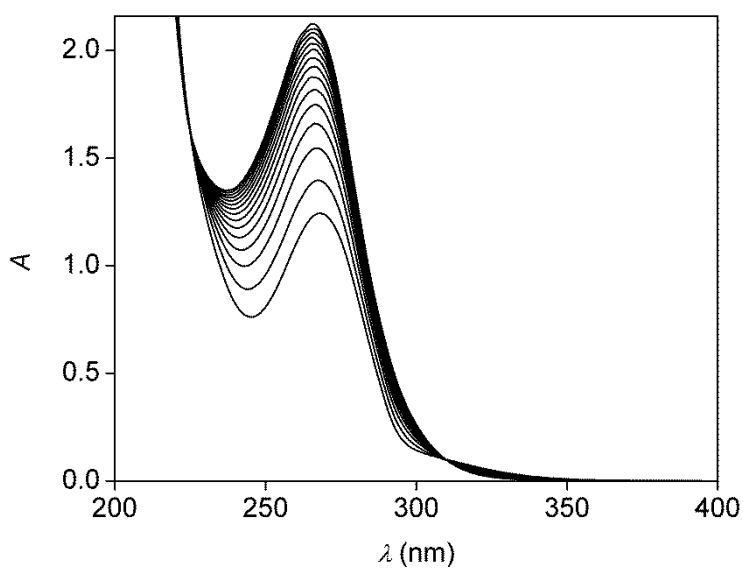

**Fig. S6** Spectral observations in the oxidation of isonicotinic amide with hypochlorite ion.  $[\text{INM}] = 0.50 \text{ mM}$ ,  $[\text{OCl}^-] = 0.50 \text{ mM}$ ,  $[\text{OH}^-]_{\text{T}} = 10.0 \text{ mM}$ ,  $T = 25 \text{ }^\circ\text{C}$ ,  $l = 1.00 \text{ cm}$ , total experiment time: 50 minutes. Consecutive spectra are recorded in every 3.5 min. The letter  $A$  represents absorbance.

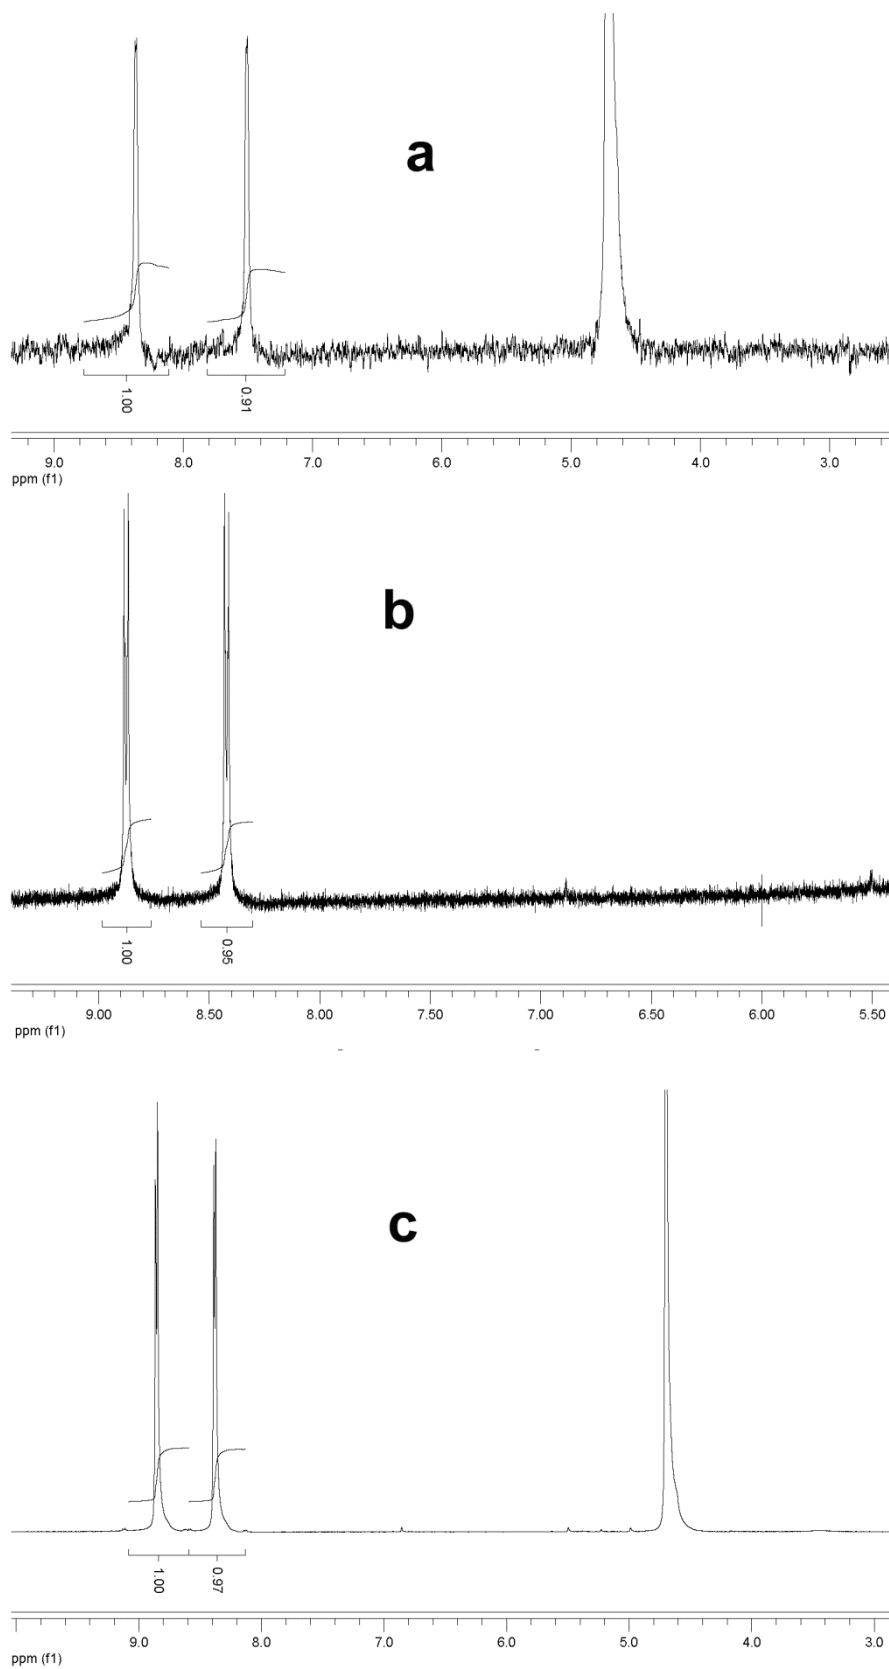

**Fig. S7** NMR spectra: isoniazid in basic medium (**a**), isoniazid with excess NaOCl after the completion of the reaction (**b**), spectrum b + isonicotinic acid (**c**)

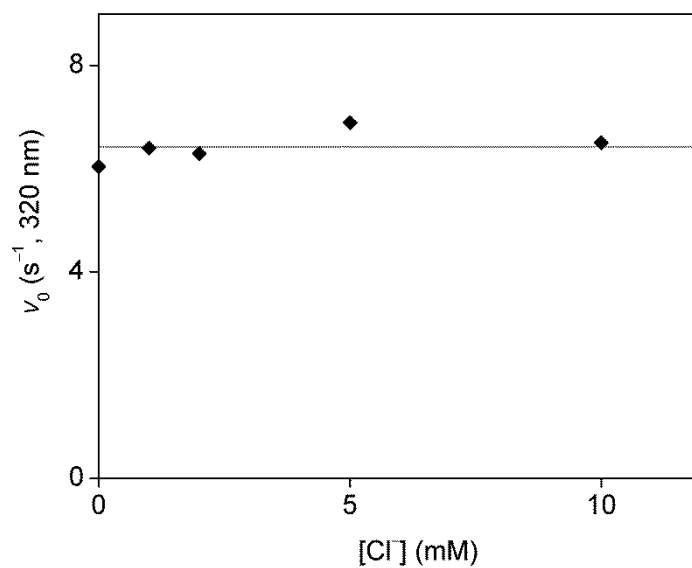

**Fig. S8** Initial rate as a function of chloride concentration in the reaction of isoniazid with hypochlorite ion.  $[\text{INH}] = 0.50 \text{ mM}$ ,  $[\text{OCl}^-] = 1.00 \text{ mM}$ ,  $[\text{OH}^-]_{\text{T}} = 10.0 \text{ mM}$ ,  $T = 25.0 \text{ }^\circ\text{C}$ ,  $l = 1.00 \text{ cm}$ .

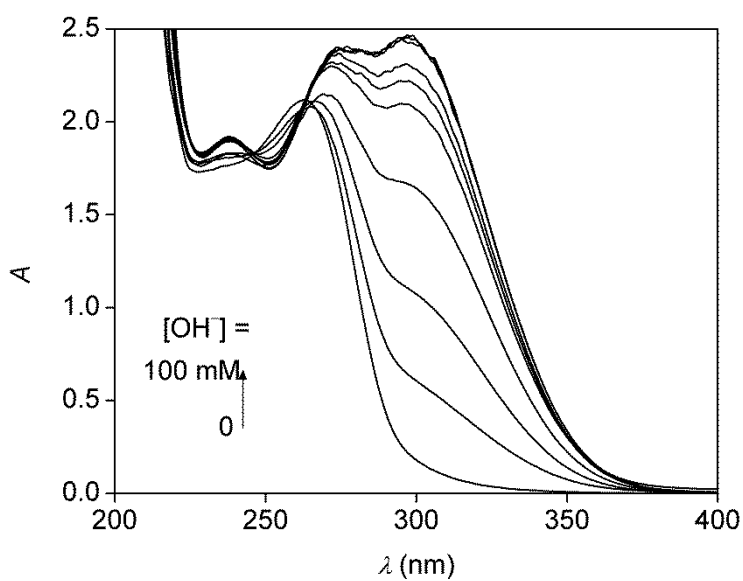

**Fig. S9** UV-vis spectrum of isoniazid at different hydroxide ion concentrations.  $[\text{INH}] = 0.50 \text{ mM}$ ,  $T = 25 \text{ }^\circ\text{C}$ ,  $l = 1.00 \text{ cm}$ . The letter  $A$  represents absorbance.



**Table S1** Results from the initial rate calculations

| [INH]<br>mM | [OCI <sup>-</sup> ] <sub>0</sub><br>mM | [OH <sup>-</sup> ] <sub>0</sub><br>mM | $v_0/A_0$<br>s <sup>-1</sup> | $k$<br>M <sup>-1</sup> s <sup>-1</sup> |
|-------------|----------------------------------------|---------------------------------------|------------------------------|----------------------------------------|
| 0.5         | 1                                      | 0.5                                   | 19.53363                     | 25284.76                               |
| 0.5         | 1                                      | 1.5                                   | 13.8846                      | 26148.39                               |
| 0.5         | 1                                      | 4.5                                   | 8.63694                      | 31523.07                               |
| 0.5         | 1                                      | 9.5                                   | 3.77325                      | 24880.87                               |
| 0.5         | 1                                      | 24.5                                  | 1.80293                      | 27813.21                               |
| 0.5         | 1                                      | 49.5                                  | 1.17333                      | 35373.27                               |
| 0.5         | 1                                      | 74.5                                  | 0.77231                      | 34652.66                               |
| 0.5         | 1                                      | 99.5                                  | 0.63123                      | 37614.96                               |
| 0.5         | 1                                      | 109.5                                 | 0.64663                      | 42340.29                               |
| 0.5         | 1                                      | 124.5                                 | 0.53473                      | 39736.34                               |
| 0.5         | 0.1                                    | 49.5                                  | 0.102485                     | 30896.95                               |
| 0.5         | 0.17                                   | 49.5                                  | 0.199074                     | 35303.69                               |
| 0.5         | 0.19                                   | 49.5                                  | 0.223895                     | 35525.93                               |
| 0.5         | 0.22                                   | 49.5                                  | 0.264271                     | 36214.46                               |
| 0.5         | 0.5                                    | 49.5                                  | 0.623053                     | 37567.31                               |
| 0.5         | 0.75                                   | 49.5                                  | 1.033162                     | 41530.02                               |
| 0.5         | 0.9                                    | 49.5                                  | 1.210784                     | 40558.24                               |
| 0.5         | 1                                      | 49.5                                  | 1.299567                     | 39179.03                               |
| 0.5         | 1.2                                    | 49.5                                  | 1.604495                     | 40309.94                               |
| 0.5         | 0.1                                    | 9.5                                   | 0.284811                     | 18780.48                               |
| 0.5         | 0.25                                   | 9.5                                   | 0.687023                     | 18120.96                               |
| 0.5         | 0.5                                    | 9.5                                   | 1.623896                     | 21415.99                               |
| 0.5         | 0.75                                   | 9.5                                   | 2.74202                      | 24107.9                                |
| 0.5         | 0.85                                   | 9.5                                   | 3.059353                     | 23733.44                               |
| 0.5         | 1                                      | 9.5                                   | 3.826806                     | 25234.01                               |
| 0.5         | 1.15                                   | 9.5                                   | 4.122397                     | 23637.52                               |
| 0.5         | 1.25                                   | 9.5                                   | 4.746321                     | 25037.85                               |
| 0.5         | 1.3                                    | 9.5                                   | 4.611849                     | 23392.77                               |
| 0.5         | 1.5                                    | 9.5                                   | 5.435251                     | 23893.42                               |
| 0.01        | 1                                      | 9.99                                  | 1.474364                     | 10147.38                               |
| 0.04        | 1                                      | 9.96                                  | 1.455027                     | 9988.591                               |
| 0.1         | 1                                      | 9.9                                   | 2.015355                     | 13763.97                               |
| 0.25        | 1                                      | 9.75                                  | 1.8715                       | 12616.2                                |
| 0.4         | 1                                      | 9.6                                   | 1.804491                     | 12005.1                                |
| 0.5         | 1                                      | 9.5                                   | 1.779371                     | 11733.2                                |
| 0.05        | 1                                      | 9.95                                  | 4.162892                     | 28553.25                               |
| 0.1         | 1                                      | 9.9                                   | 4.211765                     | 28764.47                               |
| 0.25        | 1                                      | 9.75                                  | 3.938888                     | 26552.93                               |
| 0.4         | 1                                      | 9.6                                   | 3.792327                     | 25229.97                               |
| 0.5         | 1                                      | 9.5                                   | 3.585647                     | 23643.81                               |
|             |                                        |                                       | average                      | 34061.69                               |
|             |                                        |                                       | standard deviation           | 7206.428                               |

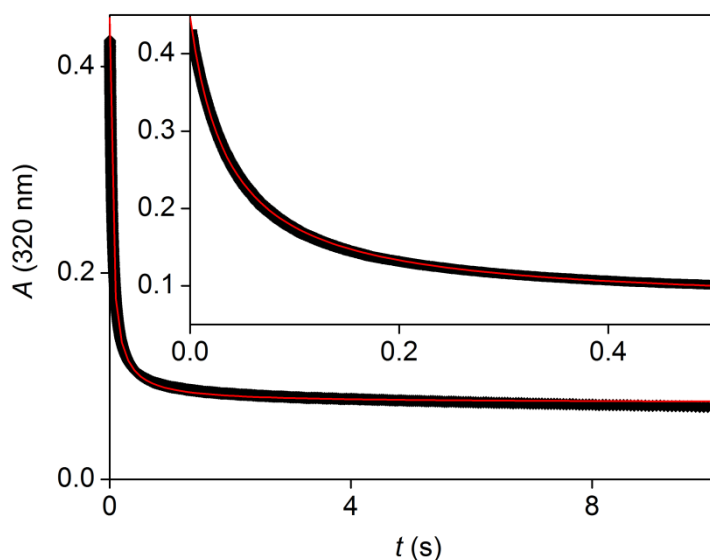

**Fig. S10** Example of fitting experimental data to Eq. 17.  $[\text{INH}] = 0.50 \text{ mM}$ ,  $[\text{OCl}^-] = 1.00 \text{ mM}$ ,  $[\text{OH}^-]_{\text{T}} = 10.0 \text{ mM}$ ,  $T = 25.0 \text{ }^\circ\text{C}$ ,  $l = 1.00 \text{ cm}$ . The letter  $A$  represents absorbance.

**Table S2** Parameters determined from the numerical fitting using Eq. 19

| $[\text{INH}]_0$<br>mM | $[\text{OCl}^-]_0$<br>mM | $[\text{OH}^-]_0$<br>mM | P1<br>dimensionless | stdev  | P2<br>$\text{s}^{-1}$ | stdev<br>$\text{s}^{-1}$ | P3<br>dimensionless | stdev  | P4<br>dimensionless | stdev   |
|------------------------|--------------------------|-------------------------|---------------------|--------|-----------------------|--------------------------|---------------------|--------|---------------------|---------|
| 0.50                   | 1.00                     | 50                      | 0.077               | 0.002  | 0.426                 | 0.009                    | 0.945               | 0.001  | 0.2558              | 0.0002  |
| 0.50                   | 1.25                     | 50                      | 0.04727             | 0.002  | 0.35                  | 0.01                     | 0.97                | 0.001  | 0.265               | 0.0003  |
| 0.50                   | 1.15                     | 50                      | 0.06775             | 0.002  | 0.42                  | 0.01                     | 0.953               | 0.001  | 0.255               | 0.0003  |
| 0.50                   | 0.85                     | 50                      | 0.05285             | 0.0007 | 0.228                 | 0.003                    | 0.9574              | 0.0005 | 0.257               | 0.0001  |
| 0.50                   | 1.50                     | 50                      | 0.44                | 0.008  | 3.2                   | 0.04                     | 0.684               | 0.007  | 0.2975              | 0.0003  |
| 0.50                   | 1.30                     | 50                      | 0.337               | 0.005  | 2.16                  | 0.02                     | 0.746               | 0.004  | 0.28                | 0.0002  |
| 0.50                   | 0.75                     | 50                      | 0.0408              | 0.0001 | 0.1502                | 0.0005                   | 0.9682              | 0.0001 | 0.31837             | 0.00004 |
| 0.85                   | 1.00                     | 50                      | 0.3122              | 0.0009 | 1.554                 | 0.003                    | 0.771               | 0.001  | 1.104               | 0.001   |
| 0.75                   | 1.00                     | 50                      | 0.1532              | 0.0003 | 0.633                 | 0.001                    | 0.896               | 0.0002 | 0.6643              | 0.0001  |
| 0.60                   | 1.00                     | 50                      | 0.0576              | 0.0006 | 0.233                 | 0.002                    | 0.9618              | 0.0004 | 0.361               | 0.0001  |
| 0.50                   | 1.00                     | 50                      | 0.071               | 0.001  | 0.34                  | 0.005                    | 0.9493              | 0.0009 | 0.2847              | 0.0002  |
| 0.40                   | 1.00                     | 50                      | 0.079               | 0.002  | 0.52                  | 0.02                     | 0.934               | 0.002  | 0.209               | 0.0002  |
| 0.25                   | 1.00                     | 50                      | 0.044               | 0.002  | 0.55                  | 0.02                     | 0.945               | 0.002  | 0.1453              | 0.0002  |
| 0.10                   | 1.00                     | 50                      | 0.0083              | 0.0006 | 0.27                  | 0.02                     | 0.977               | 0.002  | 0.1391              | 0.0001  |
